# Supplementary material for: Childhood and adult socioeconomic position interact to predict health in mid life in a cohort of British women
Source: PeerJ journal article supplement (doi:10.7717/peerj.3528), 2017-06-29
Supplement: Supplementary_Information_REVISED.pdf [file Supplementary_Information_REVISED.pdf]

**Supplemental Information for ‘Childhood and adult socioeconomic position interact to predict health in mid life in a cohort of British women’**

**S1. Study variables and descriptive statistics**

Variables used in the present study, along with their NCDS codes and descriptive statistics, are shown in table S1.

| Variable                                    | NCDS code                                                                             | Descriptives         |
|---------------------------------------------|---------------------------------------------------------------------------------------|----------------------|
| Childhood socioeconomic position (cSEP)     | Derived by PCA [see section 2] from: n2397, n492, n49/n46                             | Mean 0, s.d. 1       |
| Adult socioeconomic position (aSEP) aged 23 | Derived by PCA [see section S2] from: curroscr, hqual23                               | Mean 0, s.d. 1       |
| Adult socioeconomic position (aSEP) aged 33 | Derived by PCA [see section S2] from: curroscr, n540033, hqual23, hqual33             | Mean 0, s.d. 1       |
| Adult socioeconomic position (aSEP) aged 42 | Derived by PCA [see section S2] from: curroscr, n540033, sc, hqual23, hqual33, n7iamt | Mean 0, s.d. 1       |
| Self-rated health aged 23                   | n5739                                                                                 | Mean 3.30, s.d. 0.68 |
| Self-rated health aged 33                   | n503913                                                                               | Mean 3.17, s.d. 0.70 |
| Self-rated health aged 42                   | hlthgen                                                                               | Mean 3.07, s.d. 0.77 |

Table S1. NCDS codes and descriptive statistics for variables used.

**S2. Derivation of aSEP and cSEP variables by Principal Components Analysis**

The cSEP and aSEP variables were produced by saving the first factor (scores derived using the regression method) from a principal components analysis (PCA) of the component variables. Missing values were replaced with the mean. The extracted factors accounted respectively for 56% of the variation (cSEP), 76% of the variation (aSEP aged 23), 69% of the variation (aSEP aged 33), and 57% of the variation (aSEP aged 42). The KMO measures of sampling adequacy were 0.64 (cSEP), 0.50 (aSEP aged 23), 0.70 (aSEP aged 33), and 0.78 (aSEP aged 42); whilst  $p < 0.01$  for Bartlett’s sphericity test in all cases (cSEP:  $\chi^2_3 = 2805.74$ ; aSEP aged 23:  $\chi^2_3 = 2819.78$ ; aSEP aged 33:  $\chi^2_6 = 25162.79$ ; aSEP aged 42:  $\chi^2_{15} = 30642.85$ ). A KMO measure of at least 0.5 and a Bartlett’s test with  $p < 0.05$  are considered prerequisites for the suitability of PCA.

Loadings on the derived SEP components were as given in table S2.

| Component    | Constituent variable                                       | Loading |
|--------------|------------------------------------------------------------|---------|
| cSEP         | Father's social class                                      | -0.76   |
|              | Mother's age at leaving education                          | 0.72    |
|              | Proportion of professional fathers in child's school class | 0.76    |
| aSEP aged 23 | Highest educational qualification, age 23                  | 0.87    |
|              | Social class, age 23                                       | -0.87   |
| aSEP aged 33 | Highest educational qualification, age 23                  | 0.91    |
|              | Social class, age 23                                       | -0.74   |
|              | Highest educational qualification, age 33                  | 0.92    |
|              | Social class, age 33                                       | -0.73   |
| aSEP aged 42 | Highest educational qualification, age 23                  | 0.87    |
|              | Social class, age 23                                       | -0.72   |
|              | Highest educational qualification, age 33                  | 0.88    |
|              | Social class, age 33                                       | -0.74   |
|              | Social class, age 42                                       | -0.69   |
|              | Grouped household income, age 42                           | 0.56    |

Table S2. Loadings of individual constituent variables on the adult socioeconomic position (aSEP) and childhood socioeconomic position (cSEP) factors.

The aSEP and cSEP variables were re-standardised in running each statistical model, since different missing cases at each age point mean that the effective mean and standard deviation can otherwise depart slightly from 0 and 1 respectively in particular models.
